# Supplementary material for: Prognostic significance of clonal hematopoiesis in STEMI: a 10-year follow-up reveals high-risk gene mutations
Source: Springer Nature journal article supplement (doi:10.1186/s40246-025-00757-2), 2025-05-12

Supplementary Figure 1

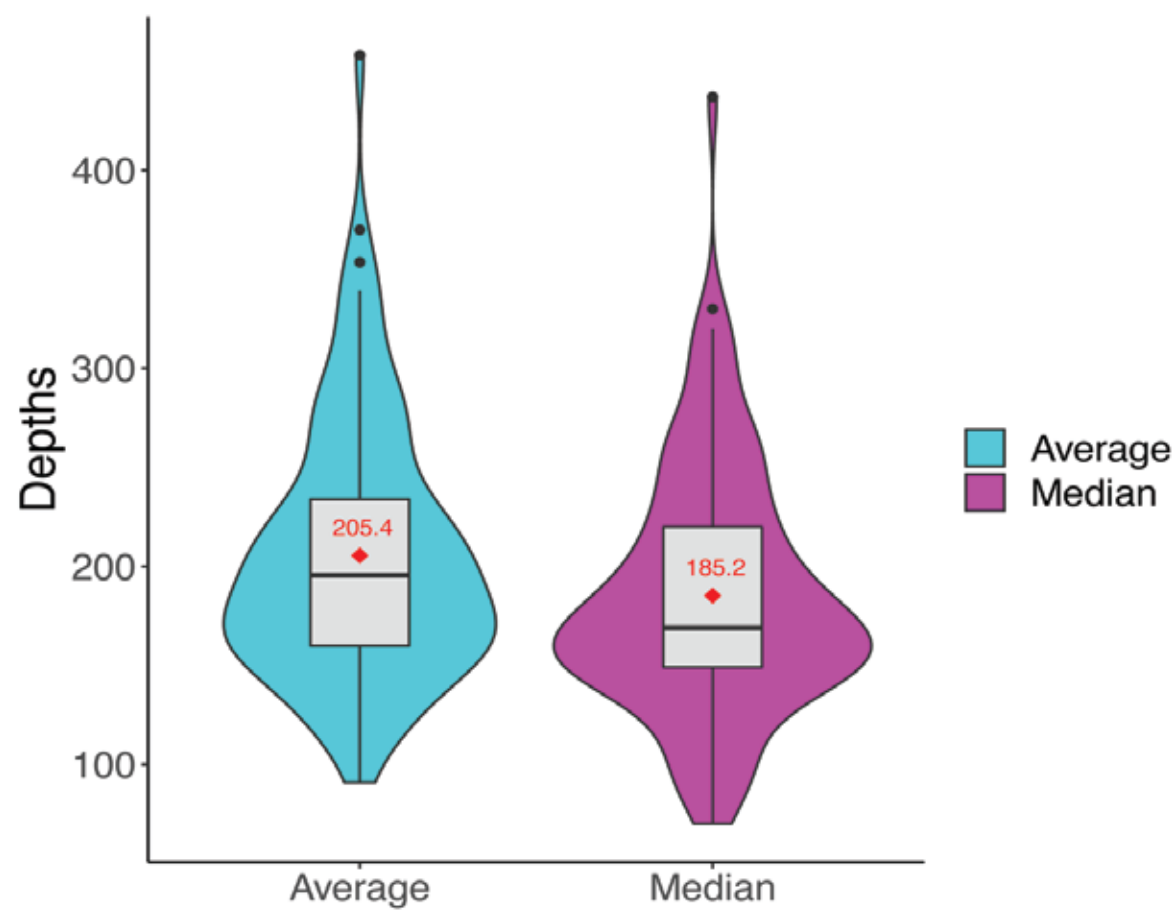

Supplement: MOESM1 [file 40246_2025_757_MOESM1_ESM.pdf]
